# Supplementary material for: Outcomes after helicopter versus ground emergency medical services for major trauma--propensity score and instrumental variable analyses: a retrospective nationwide cohort study
Source: Scand J Trauma Resusc Emerg Med. 2016 Nov 29;24:140. doi: 10.1186/s13049-016-0335-z (PMC5129603; doi:10.1186/s13049-016-0335-z)
Supplement: Additional file 1: — Patient Characteristics and Covariate Balance of Pooled Sample and Instrumental Variable Analysis. Table that illustrates patient characteristics and covariate balance relative to fire department HEMS usage for pooled sample and instrumental variable analysis. (XLSX 16 kb) [file 13049_2016_335_MOESM1_ESM.xlsx]

## Sheet: Sheet1
Additional file 1. Patient Characteristics and Covariate Balance of Pooled Sample and Instrumental Variable Analysis.
	Pooled groups					IV groups
	HEMS		GEMS		SD, %	HEMS preference		GEMS preference		SD, %
	n = 2629 (%)		n = 10118 (%)			n = 2558 (%)		n = 9953 (%)
Age, years
15 - 55	1059	40.3	3970	39.2	2.24788	999	39.1	3937	39.6	-1.0235
56 - 64	448	17	1605	15.9	2.96746	425	16.6	1586	15.9	1.89757
≥ 65	1122	42.7	4543	44.9	-4.43531	1134	44.3	4430	44.5	-0.402533
Sex male	2006	76.3	6992	69.1	16.2146	1904	74.4	6922	69.6	10.7058
Systolic blood pressure, mm Hg a
< 90	200	7.6	613	6.1	5.94082	160	6.3	635	6.4	-0.410072
90 to 109	277	10.5	1212	12	-4.74846	263	10.3	1188	11.9	-5.09505
≥ 110	1346	51.2	6442	63.7	-25.4867	1398	54.7	6272	63	-16.9266
missing	806	30.7	1851	18.3	29.1357	737	28.8	1858	18.7	23.9028
Heart rate, beats/min a
< 60	141	5.4	480	4.7	3.19713	114	4.5	488	4.9	-1.8901
60 to 99	1273	48.4	6038	59.7	-22.8216	1287	50.3	5900	59.3	-18.1579
≥ 100	528	20.1	2318	22.9	-6.81956	504	19.7	2294	23.1	-8.29725
missing	687	26.1	1282	12.7	34.3844	653	25.5	1271	12.8	32.7047
Respiratory rate, breaths/min a
< 10 or > 29	504	19.2	1736	17.2	5.18518	444	17.4	1748	17.6	-0.526363
10 to 29	1217	46.3	6453	63.8	-35.7371	1291	50.5	6262	62.9	-25.2239
missing	908	34.5	1929	19.1	35.3071	823	32.2	1943	19.5	29.318
Japan Coma Scale a
Grade 0	561	21.3	2770	27.4	-14.2487	593	23.2	2679	26.9	-8.54689
Grade 1	592	22.5	3299	32.6	-22.7527	661	25.8	3171	31.9	-13.4945
Grade 2	269	10.2	1039	10.3	-0.329702	256	10	1035	10.4	-1.32169
Grade 3	596	22.7	2401	23.7	-2.36922	495	19.4	2430	24.4	-12.112
missing	611	23.2	609	6	50.2229	553	21.6	638	6.4	44.8958
Preexisting medical conditions
Neurological diseases	261	9.9	1417	14	-12.665	293	11.5	1360	13.7	-6.63316
Cardiovascular diseases	562	21.4	2358	23.3	-4.56202	572	22.4	2306	23.2	-1.90693
Respiratory disease	129	4.9	363	3.6	6.4477	113	4.4	371	3.7	3.55154
Digestive diseases	205	7.8	776	7.7	0.373996	204	8	765	7.7	1.11544
Metabolic disease	254	9.7	1099	10.9	-3.94867	240	9.4	1097	11	-5.28851
Others	253	9.6	734	7.3	8.27641	250	9.8	723	7.3	8.94951
Mechanism of injury
Automobile crash	503	19.1	1331	13.2	16.0847	493	19.3	1292	13	17.183
Motorcycle crash	391	14.9	1581	15.6	-1.94721	363	14.2	1576	15.8	-4.48202
Bicycle crash	206	7.8	1339	13.2	-17.6839	238	9.3	1279	12.9	-11.479
Pedestrian traffic accident	200	7.6	934	9.2	-5.7705	223	8.7	892	9	-1.05628
Other vehicle	20	0.8	57	0.6	2.39904	15	0.6	59	0.6	0
Fall from high place or Stairs	888	33.8	3695	36.5	-5.65744	868	33.9	3641	36.6	-5.65377
Machine injury	43	1.6	61	0.6	9.59854	30	1.2	72	0.7	5.15615
Falling object or Explosion	69	2.6	182	1.8	5.45595	60	2.4	185	1.9	3.44774
Compression by heavy stuff	124	4.7	237	2.3	13.087	98	3.8	255	2.6	6.82215
Train	14	0.5	80	0.8	-3.73385	11	0.4	83	0.8	-5.18128
Sports	54	2.1	111	1.1	7.97604	40	1.6	121	1.2	3.40503
Other blunt injury	51	1.9	187	1.9	0	48	1.9	186	1.9	0
Penetrating	46	1.8	181	1.8	0	52	2	172	1.7	2.22647
missing	20	0.8	142	1.4	-5.75488	19	0.7	140	1.4	-6.8715
Injury Severity Score
16 to 24	1118	42.5	5192	51.3	-17.7029	1187	46.4	5029	50.5	-8.21085
25 to 34	927	35.3	3294	32.6	5.70406	857	33.5	3278	32.9	1.2741
≥ 35	584	22.2	1632	16.1	15.5494	514	20.1	1646	16.5	9.32045
Accident day
Working day	1841	70	7246	71.6	-3.51949	1782	69.7	7139	71.7	-4.39533
Weekend	788	30	2872	28.4	3.51949	776	30.3	2814	28.3	4.39533
a recorded pre-hospital vital signs
Notes: Total may not become 100% due to rounding off.
Abbreviations: HEMS, helicopter emergency medical services; GEMS, ground emergency medical services; AIS, abbreviated injury scale, SD; Standardized difference.
